# Supplementary material
Source: PubMed Central journal article supplement (PMC3587043)
Supplement: NIHMS420156-supplement-Supp_TableS1-S6_FigureS1-S4.pdf [file NIHMS420156-supplement-Supp_TableS1-S6_FigureS1-S4.pdf]

---

## Supporting Information

### Cancer cells preferentially lose small chromosomes

Pascal H.G. Duijf, Nikolaus Schultz and Robert Benezra

This Supplementary Information file contains the following.

- **Supplementary Table 1** (Page 2)

Comparison of chromosome properties and individual gain and loss rates in a total of 19,003 human solid tumors

- **Supplementary Table 2** (Page 3)

Comparison of whole-chromosome aneuploidy rates in different human tumor types

- **Supplementary Table 3** (Page 4)

Comparison of whole-chromosome aneuploidy rates in human solid tumors for different organs/tumor sites

- **Supplementary Table 4** (Page 5)

Comparison of gain and loss rates of individual chromosomes in 570 human ovarian cystadenocarcinomas

- **Supplementary Table 5** (Page 6)

Comparison of gain and loss rates of individual chromosomes in 520 colorectal adenocarcinomas

- **Supplementary Table 6** (Page 7)

Comparison of gain and loss rates of individual chromosomes in 23,165 human non-solid tumors

- **Supplementary Figure 1** (Page 8)

In human solid tumors, a correlation between the incidence and size or gene number of the chromosome exists neither in general nor in trisomic tumors

- **Supplementary Figure 2** (Page 9)

Ovarian serous cystadenocarcinomas and colorectal adenocarcinomas preferentially lose, but not gain, small chromosomes

- **Supplementary Figure 3** (Page 10)

Whole-chromosome aneuploidy state of a tumor correlates with the survival of ovarian serous cystadenocarcinoma patients

- **Supplementary Figure 4** (Page 11)

A comparison between early- and late-stage whole-chromosome aneuploidies in human astrocytoma provides insights into tumor evolution.

**Supplementary Table 1**

Comparison of chromosome properties and individual gain and loss rates in a total of 19,003 human solid tumors

| Chromo-<br>some    | Chromosome<br>size<br>(bp) | Genes on<br>chromo-<br>some<br>(#) | Rate lost                              |                            | Rate lost<br>in all solid<br>tumors<br>(%) | Gained in<br>tumors<br>(# cases) | Rate<br>gained in                   |                            | Rate<br>gained in<br>all solid<br>tumors<br>(%) | Median<br>rate in<br>solid<br>aneuploid<br>tumors<br>(%) | Median<br>rate in all<br>solid<br>tumors<br>(%) |
|--------------------|----------------------------|------------------------------------|----------------------------------------|----------------------------|--------------------------------------------|----------------------------------|-------------------------------------|----------------------------|-------------------------------------------------|----------------------------------------------------------|-------------------------------------------------|
|                    |                            |                                    | in solid<br>aneuploid<br>tumors<br>(%) | aneuploid<br>tumors<br>(%) |                                            |                                  | solid<br>aneuploid<br>tumors<br>(%) | all solid<br>tumors<br>(%) |                                                 |                                                          |                                                 |
| 1                  | 249,250,621                | 3141                               | 1004                                   | 7.78                       | 5.28                                       | 386                              | 2.99                                | 2.03                       | -2.39                                           | -1.63                                                    |                                                 |
| 2                  | 243,199,373                | 1346                               | 853                                    | 6.61                       | 4.49                                       | 901                              | 6.98                                | 4.74                       | 0.19                                            | 0.13                                                     |                                                 |
| 3                  | 198,022,430                | 1463                               | 1152                                   | 8.93                       | 6.06                                       | 827                              | 6.41                                | 4.35                       | -1.26                                           | -0.86                                                    |                                                 |
| 4                  | 191,154,276                | 796                                | 1460                                   | 11.31                      | 7.68                                       | 355                              | 2.75                                | 1.87                       | -4.28                                           | -2.91                                                    |                                                 |
| 5                  | 180,915,260                | 923                                | 1038                                   | 8.04                       | 5.46                                       | 1015                             | 7.87                                | 5.34                       | -0.09                                           | -0.06                                                    |                                                 |
| 6                  | 171,115,067                | 1557                               | 1263                                   | 9.79                       | 6.65                                       | 520                              | 4.03                                | 2.74                       | -2.88                                           | -1.95                                                    |                                                 |
| 7                  | 159,138,663                | 1150                               | 636                                    | 4.93                       | 3.35                                       | 2719                             | 21.07                               | 14.31                      | 8.07                                            | 5.48                                                     |                                                 |
| 8                  | 146,364,022                | 793                                | 1364                                   | 10.57                      | 7.18                                       | 1439                             | 11.15                               | 7.57                       | 0.29                                            | 0.20                                                     |                                                 |
| 9                  | 141,213,431                | 1149                               | 1618                                   | 12.54                      | 8.51                                       | 636                              | 4.93                                | 3.35                       | -3.81                                           | -2.58                                                    |                                                 |
| 10                 | 135,534,747                | 927                                | 1829                                   | 14.17                      | 9.62                                       | 474                              | 3.67                                | 2.49                       | -5.25                                           | -3.57                                                    |                                                 |
| 11                 | 135,006,516                | 1524                               | 1230                                   | 9.53                       | 6.47                                       | 569                              | 4.41                                | 2.99                       | -2.56                                           | -1.74                                                    |                                                 |
| 12                 | 133,851,895                | 1342                               | 884                                    | 6.85                       | 4.65                                       | 1623                             | 12.58                               | 8.54                       | 2.86                                            | 1.94                                                     |                                                 |
| 13                 | 115,169,878                | 633                                | 1964                                   | 15.22                      | 10.34                                      | 650                              | 5.04                                | 3.42                       | -5.09                                           | -3.46                                                    |                                                 |
| 14                 | 107,349,540                | 1050                               | 1997                                   | 15.48                      | 10.51                                      | 389                              | 3.01                                | 2.05                       | -6.23                                           | -4.23                                                    |                                                 |
| 15                 | 102,531,392                | 695                                | 1715                                   | 13.29                      | 9.02                                       | 454                              | 3.52                                | 2.39                       | -4.89                                           | -3.32                                                    |                                                 |
| 16                 | 90,354,753                 | 880                                | 1407                                   | 10.90                      | 7.40                                       | 698                              | 5.41                                | 3.67                       | -2.75                                           | -1.87                                                    |                                                 |
| 17                 | 81,195,210                 | 1266                               | 1572                                   | 12.18                      | 8.27                                       | 730                              | 5.66                                | 3.84                       | -3.26                                           | -2.22                                                    |                                                 |
| 18                 | 78,077,248                 | 337                                | 1738                                   | 13.47                      | 9.15                                       | 836                              | 6.48                                | 4.40                       | -3.50                                           | -2.37                                                    |                                                 |
| 19                 | 59,128,983                 | 1461                               | 1300                                   | 10.07                      | 6.84                                       | 684                              | 5.30                                | 3.60                       | -2.39                                           | -1.62                                                    |                                                 |
| 20                 | 63,025,520                 | 727                                | 953                                    | 7.39                       | 5.01                                       | 1475                             | 11.43                               | 7.76                       | 2.02                                            | 1.37                                                     |                                                 |
| 21                 | 48,129,895                 | 225                                | 1496                                   | 11.59                      | 7.87                                       | 929                              | 7.20                                | 4.89                       | -2.20                                           | -1.49                                                    |                                                 |
| 22                 | 51,304,566                 | 545                                | 2600                                   | 20.15                      | 13.68                                      | 527                              | 4.08                                | 2.77                       | -8.03                                           | -5.45                                                    |                                                 |
| X                  | 155,270,560                | 1098                               | 2473                                   | 19.16                      | 13.01                                      | 999                              | 7.74                                | 5.26                       | -5.71                                           | -3.88                                                    |                                                 |
| Y                  | 59,373,566                 | 78                                 | 2475                                   | 19.18                      | 13.02                                      | 433                              | 3.36                                | 2.28                       | -7.91                                           | -5.37                                                    |                                                 |
| <b>Overall/any</b> | <b>3,095,677,412</b>       | <b>25,106</b>                      | <b>9851</b>                            | <b>76.34</b>               | <b>51.84</b>                               | <b>7562</b>                      | <b>58.60</b>                        | <b>39.79</b>               |                                                 |                                                          |                                                 |

---

**Supplementary Table 2**

Comparison of whole-chromosome aneuploidy rates in different human tumor types

| <b>Tumor type</b>           | <b>Total<br/>(# cases)</b> | <b>Chromosome<br/>loss/gain<br/>(# cases)</b> | <b>Chromosome<br/>loss/gain<br/>(%)</b> |
|-----------------------------|----------------------------|-----------------------------------------------|-----------------------------------------|
| <b>All solid tumors</b>     | <b>19003</b>               | <b>12904</b>                                  | <b>67.91</b>                            |
| <b>All carcinomas</b>       | <b>6005</b>                | <b>4168</b>                                   | <b>69.41</b>                            |
| Adenocarcinoma              | 3793                       | 2679                                          | 70.63                                   |
| Basal cell carcinoma        | 102                        | 74                                            | 72.55                                   |
| Melanoma                    | 359                        | 273                                           | 76.04                                   |
| Squamous cell carcinoma     | 696                        | 502                                           | 72.13                                   |
| Transitional cell carcinoma | 204                        | 143                                           | 70.10                                   |
| <b>All lymphomas</b>        | <b>4317</b>                | <b>2958</b>                                   | <b>68.52</b>                            |
| B-cell lymphoma             | 1788                       | 1242                                          | 69.46                                   |
| Follicular lymphoma         | 1426                       | 1011                                          | 70.90                                   |
| Mantle cell lymphoma        | 585                        | 323                                           | 55.21                                   |
| T-cell lymphoma             | 168                        | 127                                           | 75.60                                   |
| <b>All sarcomas</b>         | <b>2254</b>                | <b>1408</b>                                   | <b>62.47</b>                            |
| Ewing sarcoma               | 433                        | 259                                           | 59.82                                   |
| Fibrosarcoma                | 64                         | 40                                            | 62.50                                   |
| Leiomyosarcoma              | 120                        | 78                                            | 65.00                                   |
| Rhabdomyosarcoma            | 188                        | 117                                           | 62.23                                   |
| Synovial sarcoma            | 203                        | 151                                           | 74.38                                   |
| Astrocytoma                 | 621                        | 540                                           | 86.96                                   |
| Glioblastoma                | 106                        | 97                                            | 91.51                                   |
| Glioma                      | 97                         | 84                                            | 86.60                                   |

**Supplementary Table 3**

Comparison of whole-chromosome aneuploidy rates in human solid tumors for different organs/tumor sites

| Tumor site     | Unit | Total | No whole-chromosome loss or gain | Whole-chromosome loss or gain | Whole-chromosome loss | Whole-chromosome gain | Whole-chromosome loss and gain |
|----------------|------|-------|----------------------------------|-------------------------------|-----------------------|-----------------------|--------------------------------|
| Bladder        | #    | 196   | 60                               | 136                           | 122                   | 68                    | 54                             |
|                | %    | 100.0 | 30.6                             | <b>69.4</b>                   | 62.2                  | 34.7                  | 27.6                           |
| Brain          | #    | 1842  | 305                              | 1537                          | 1434                  | 567                   | 433                            |
|                | %    | 100.0 | 16.6                             | <b>83.4</b>                   | 77.9                  | 30.8                  | 23.5                           |
| Breast         | #    | 1120  | 428                              | 692                           | 541                   | 407                   | 208                            |
|                | %    | 100.0 | 38.2                             | <b>61.8</b>                   | 48.3                  | 36.3                  | 18.6                           |
| Cervix         | #    | 84    | 52                               | 32                            | 30                    | 26                    | 24                             |
|                | %    | 100.0 | 61.9                             | <b>38.1</b>                   | 35.7                  | 31.0                  | 28.6                           |
| Colon          | #    | 550   | 137                              | 413                           | 282                   | 343                   | 198                            |
|                | %    | 100.0 | 24.9                             | <b>75.1</b>                   | 51.3                  | 62.4                  | 36.0                           |
| Esophagus      | #    | 59    | 16                               | 43                            | 35                    | 24                    | 16                             |
|                | %    | 100.0 | 27.1                             | <b>72.9</b>                   | 59.3                  | 40.7                  | 27.1                           |
| Kidney         | #    | 1862  | 364                              | 1498                          | 1149                  | 983                   | 614                            |
|                | %    | 100.0 | 19.5                             | <b>80.5</b>                   | 61.7                  | 52.8                  | 33.0                           |
| Liver          | #    | 168   | 43                               | 125                           | 59                    | 104                   | 37                             |
|                | %    | 100.0 | 25.6                             | <b>74.4</b>                   | 35.1                  | 61.9                  | 22.0                           |
| Lung           | #    | 689   | 293                              | 396                           | 355                   | 228                   | 181                            |
|                | %    | 100.0 | 42.5                             | <b>57.5</b>                   | 51.5                  | 33.1                  | 26.3                           |
| Ovary          | #    | 655   | 265                              | 390                           | 271                   | 265                   | 140                            |
|                | %    | 100.0 | 40.5                             | <b>59.5</b>                   | 41.4                  | 40.5                  | 21.4                           |
| Pancreas       | #    | 152   | 42                               | 110                           | 102                   | 65                    | 51                             |
|                | %    | 100.0 | 27.6                             | <b>72.4</b>                   | 67.1                  | 42.8                  | 33.6                           |
| Prostate       | #    | 230   | 87                               | 143                           | 115                   | 55                    | 19                             |
|                | %    | 100.0 | 37.8                             | <b>62.2</b>                   | 50.0                  | 23.9                  | 8.3                            |
| Salivary gland | #    | 489   | 311                              | 178                           | 132                   | 83                    | 27                             |
|                | %    | 100.0 | 63.6                             | <b>36.4</b>                   | 27.0                  | 17.0                  | 5.5                            |
| Skeleton       | #    | 1068  | 388                              | 680                           | 490                   | 415                   | 214                            |
|                | %    | 100.0 | 36.3                             | <b>63.7</b>                   | 45.9                  | 38.9                  | 20.0                           |
| Skin           | #    | 330   | 118                              | 212                           | 168                   | 139                   | 86                             |
|                | %    | 100.0 | 35.8                             | <b>64.2</b>                   | 50.9                  | 42.1                  | 26.1                           |
| Spleen         | #    | 239   | 115                              | 124                           | 82                    | 78                    | 35                             |
|                | %    | 100.0 | 48.1                             | <b>51.9</b>                   | 34.3                  | 32.6                  | 14.6                           |
| Stomach        | #    | 223   | 60                               | 163                           | 138                   | 108                   | 82                             |
|                | %    | 100.0 | 26.9                             | <b>73.1</b>                   | 61.9                  | 48.4                  | 36.8                           |
| Testis         | #    | 358   | 77                               | 281                           | 268                   | 243                   | 229                            |
|                | %    | 100.0 | 21.5                             | <b>78.5</b>                   | 74.9                  | 67.9                  | 64.0                           |
| Uterus         | #    | 779   | 467                              | 312                           | 238                   | 138                   | 62                             |
|                | %    | 100.0 | 59.9                             | <b>40.1</b>                   | 30.6                  | 17.7                  | 8.0                            |
| Vagina         | #    | 72    | 19                               | 53                            | 39                    | 37                    | 18                             |
|                | %    | 100.0 | 26.4                             | <b>73.6</b>                   | 54.2                  | 51.4                  | 25.0                           |

The shaded boxes indicate the bias towards chromosome loss or gain. Overall whole-chromosome aneuploidy fractions are highlighted in bold.

---

**Supplementary Table 4**

Comparison of gain and loss rates of individual chromosomes in 570 human ovarian cystadenocarcinomas

| Chromosome                    | Lost in tumors (# cases) | Rate lost in tumors (%) | Gained in tumors (# cases) | Rate gained in tumors (%) | Median rate in tumors (%) |
|-------------------------------|--------------------------|-------------------------|----------------------------|---------------------------|---------------------------|
| 1                             | 1                        | 0.18                    | 18                         | 3.16                      | 1.49                      |
| 2                             | 2                        | 0.35                    | 29                         | 5.09                      | 2.37                      |
| 3                             | 1                        | 0.18                    | 25                         | 4.39                      | 2.11                      |
| 4                             | 127                      | 22.28                   | 0                          | 0.00                      | -11.14                    |
| 5                             | 13                       | 2.28                    | 7                          | 1.23                      | -0.53                     |
| 6                             | 31                       | 5.44                    | 15                         | 2.63                      | -1.40                     |
| 7                             | 9                        | 1.58                    | 40                         | 7.02                      | 2.72                      |
| 8                             | 6                        | 1.05                    | 15                         | 2.63                      | 0.79                      |
| 9                             | 92                       | 16.14                   | 5                          | 0.88                      | -7.63                     |
| 10                            | 8                        | 1.40                    | 15                         | 2.63                      | 0.61                      |
| 11                            | 19                       | 3.33                    | 5                          | 0.88                      | -1.23                     |
| 12                            | 6                        | 1.05                    | 39                         | 6.84                      | 2.89                      |
| 13                            | 160                      | 28.07                   | 22                         | 3.86                      | -12.11                    |
| 14                            | 81                       | 14.21                   | 8                          | 1.40                      | -6.40                     |
| 15                            | 115                      | 20.18                   | 4                          | 0.70                      | -9.74                     |
| 16                            | 91                       | 15.96                   | 6                          | 1.05                      | -7.46                     |
| 17                            | 97                       | 17.02                   | 0                          | 0.00                      | -8.51                     |
| 18                            | 45                       | 7.89                    | 5                          | 0.88                      | -3.51                     |
| 19                            | 29                       | 5.09                    | 0                          | 0.00                      | -2.54                     |
| 20                            | 0                        | 0.00                    | 100                        | 17.54                     | 8.77                      |
| 21                            | 46                       | 8.07                    | 0                          | 0.00                      | -4.04                     |
| 22                            | 246                      | 43.16                   | 4                          | 0.70                      | -21.23                    |
| <b>Overall/any chromosome</b> | <b>441</b>               | <b>77.37</b>            | <b>170</b>                 | <b>29.82</b>              |                           |

For this analysis we used TCGA aCGH data from which information from the X and Y chromosomes was not available.

---

**Supplementary Table 5**

Comparison of gain and loss rates of individual chromosomes in 520 colorectal adenocarcinomas

| <b>Chromosome</b>             | <b>Lost in tumors (# cases)</b> | <b>Rate lost in tumors (%)</b> | <b>Gained in tumors (# cases)</b> | <b>Rate gained in tumors (%)</b> | <b>Median rate in tumors (%)</b> |
|-------------------------------|---------------------------------|--------------------------------|-----------------------------------|----------------------------------|----------------------------------|
| 1                             | 7                               | 1.35                           | 2                                 | 0.38                             | <b>-0.48</b>                     |
| 2                             | 7                               | 1.35                           | 22                                | 4.23                             | <b>1.44</b>                      |
| 3                             | 12                              | 2.31                           | 9                                 | 1.73                             | <b>-0.29</b>                     |
| 4                             | 70                              | 13.46                          | 1                                 | 0.19                             | <b>-6.63</b>                     |
| 5                             | 15                              | 2.88                           | 4                                 | 0.77                             | <b>-1.06</b>                     |
| 6                             | 12                              | 2.31                           | 24                                | 4.62                             | <b>1.15</b>                      |
| 7                             | 1                               | 0.19                           | 165                               | 31.73                            | <b>15.77</b>                     |
| 8                             | 5                               | 0.96                           | 51                                | 9.81                             | <b>4.42</b>                      |
| 9                             | 26                              | 5.00                           | 30                                | 5.77                             | <b>0.38</b>                      |
| 10                            | 24                              | 4.62                           | 1                                 | 0.19                             | <b>-2.21</b>                     |
| 11                            | 18                              | 3.46                           | 9                                 | 1.73                             | <b>-0.87</b>                     |
| 12                            | 8                               | 1.54                           | 47                                | 9.04                             | <b>3.75</b>                      |
| 13                            | 4                               | 0.77                           | 263                               | 50.58                            | <b>24.90</b>                     |
| 14                            | 127                             | 24.42                          | 6                                 | 1.15                             | <b>-11.63</b>                    |
| 15                            | 114                             | 21.92                          | 2                                 | 0.38                             | <b>-10.77</b>                    |
| 16                            | 6                               | 1.15                           | 39                                | 7.50                             | <b>3.17</b>                      |
| 17                            | 24                              | 4.62                           | 1                                 | 0.19                             | <b>-2.21</b>                     |
| 18                            | 195                             | 37.50                          | 1                                 | 0.19                             | <b>-18.65</b>                    |
| 19                            | 4                               | 0.77                           | 14                                | 2.69                             | <b>0.96</b>                      |
| 20                            | 0                               | 0.00                           | 160                               | 30.77                            | <b>15.38</b>                     |
| 21                            | 23                              | 4.42                           | 0                                 | 0.00                             | <b>-2.21</b>                     |
| 22                            | 106                             | 20.38                          | 3                                 | 0.58                             | <b>-9.90</b>                     |
| <b>Overall/any chromosome</b> | <b>318</b>                      | <b>61.15</b>                   | <b>389</b>                        | <b>74.81</b>                     |                                  |

For this analysis we used TCGA aCGH data from which information from the X and Y chromosomes was not available.

---

**Supplementary Table 6**

Comparison of gain and loss rates of individual chromosomes in 23,165 human non-solid tumors

| <b>Chromosome</b>             | <b>Lost in tumors<br/>(# cases)</b> | <b>Rate lost in tumors<br/>(%)</b> | <b>Gained in tumors<br/>(# cases)</b> | <b>Rate gained in tumors<br/>(%)</b> | <b>Median rate<br/>in tumors<br/>(%)</b> |
|-------------------------------|-------------------------------------|------------------------------------|---------------------------------------|--------------------------------------|------------------------------------------|
| 1                             | 532                                 | 2.30                               | 190                                   | 0.82                                 | <b>-0.74</b>                             |
| 2                             | 454                                 | 1.96                               | 229                                   | 0.99                                 | <b>-0.49</b>                             |
| 3                             | 594                                 | 2.56                               | 559                                   | 2.41                                 | <b>-0.08</b>                             |
| 4                             | 484                                 | 2.09                               | 940                                   | 4.06                                 | <b>0.98</b>                              |
| 5                             | 675                                 | 2.91                               | 789                                   | 3.41                                 | <b>0.25</b>                              |
| 6                             | 380                                 | 1.64                               | 1138                                  | 4.91                                 | <b>1.64</b>                              |
| 7                             | 1817                                | 7.84                               | 566                                   | 2.44                                 | <b>-2.70</b>                             |
| 8                             | 702                                 | 3.03                               | 2210                                  | 9.54                                 | <b>3.25</b>                              |
| 9                             | 804                                 | 3.47                               | 809                                   | 3.49                                 | <b>0.01</b>                              |
| 10                            | 501                                 | 2.16                               | 893                                   | 3.85                                 | <b>0.85</b>                              |
| 11                            | 541                                 | 2.34                               | 703                                   | 3.03                                 | <b>0.35</b>                              |
| 12                            | 777                                 | 3.35                               | 907                                   | 3.92                                 | <b>0.28</b>                              |
| 13                            | 1295                                | 5.59                               | 387                                   | 1.67                                 | <b>-1.96</b>                             |
| 14                            | 736                                 | 3.18                               | 950                                   | 4.10                                 | <b>0.46</b>                              |
| 15                            | 729                                 | 3.15                               | 707                                   | 3.05                                 | <b>-0.05</b>                             |
| 16                            | 917                                 | 3.96                               | 205                                   | 0.88                                 | <b>-1.54</b>                             |
| 17                            | 1071                                | 4.62                               | 737                                   | 3.18                                 | <b>-0.72</b>                             |
| 18                            | 690                                 | 2.98                               | 1121                                  | 4.84                                 | <b>0.93</b>                              |
| 19                            | 531                                 | 2.29                               | 937                                   | 4.04                                 | <b>0.88</b>                              |
| 20                            | 965                                 | 4.17                               | 367                                   | 1.58                                 | <b>-1.29</b>                             |
| 21                            | 694                                 | 3.00                               | 2703                                  | 11.67                                | <b>4.34</b>                              |
| 22                            | 749                                 | 3.23                               | 608                                   | 2.62                                 | <b>-0.30</b>                             |
| X                             | 1731                                | 7.47                               | 1390                                  | 6.00                                 | <b>-0.74</b>                             |
| Y                             | 1289                                | 5.56                               | 377                                   | 1.63                                 | <b>-1.97</b>                             |
| <b>Overall/any chromosome</b> | <b>8461</b>                         | <b>36.52</b>                       | <b>7834</b>                           | <b>33.82</b>                         |                                          |

### Supplementary Figure 1

In human solid tumors, a correlation between the incidence and size or gene number of the chromosome exists neither in general nor in trisomic tumors

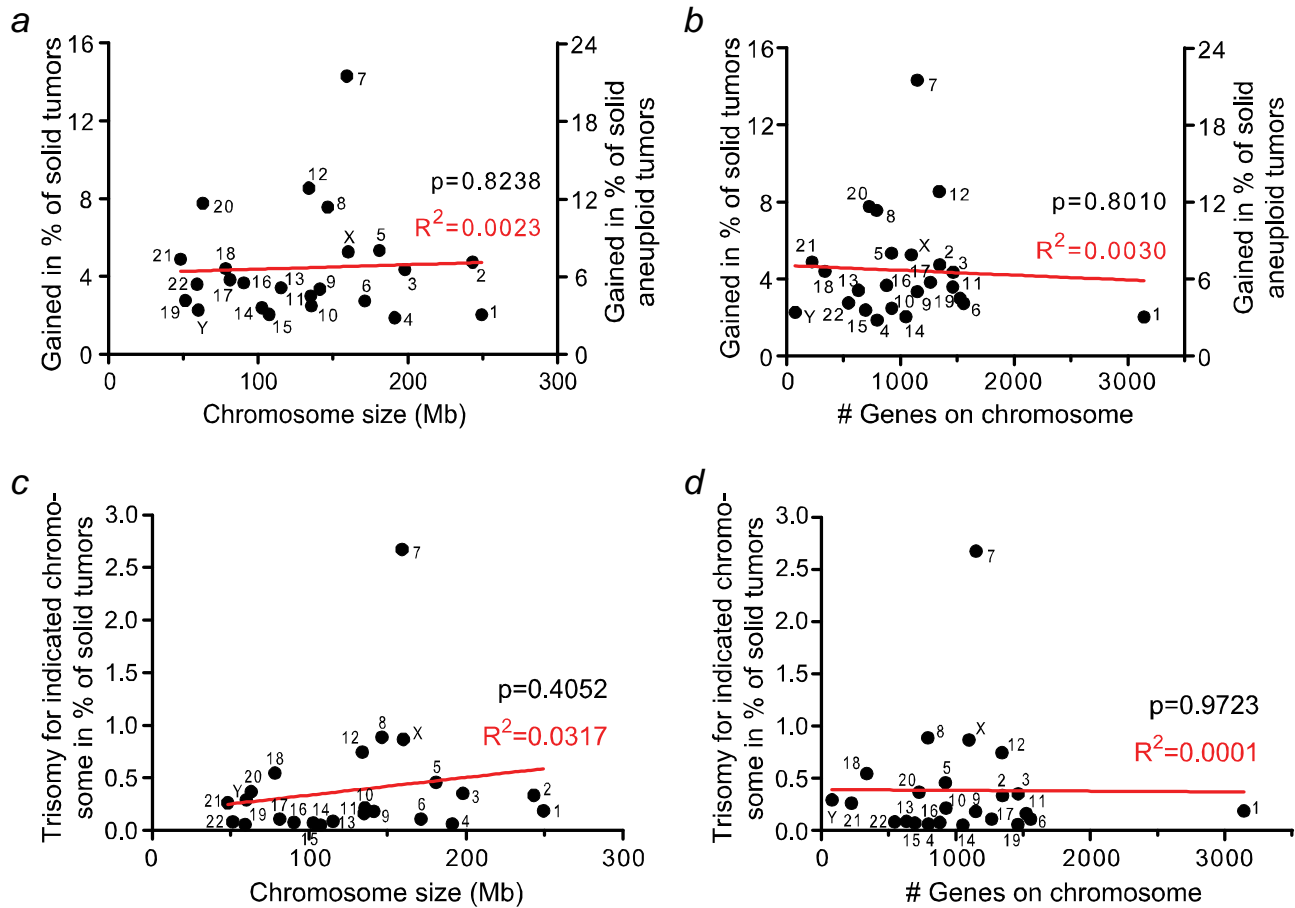

(a) Scatter plot of chromosome size in megabases (Mb) in relationship to the rate at which the chromosome is gained in human solid tumors.

(b) Scatter plot of the number of genes on the chromosome in relationship to the rate at which the chromosome is gained in human solid tumors.

(c) Scatter plot comparing the rate at which the extra chromosome in trisomic tumors is gained to the size of the extra chromosome. Only "2n+1" tumors are included in this analysis. The indicated rates represent the fraction of all 19,003 solid tumors.

(d) Analysis as in (a) but compared to the number of genes on the extra chromosome.



### Supplementary Figure 2

Ovarian serous cystadenocarcinomas and colorectal adenocarcinomas preferentially lose, but not gain, small chromosomes

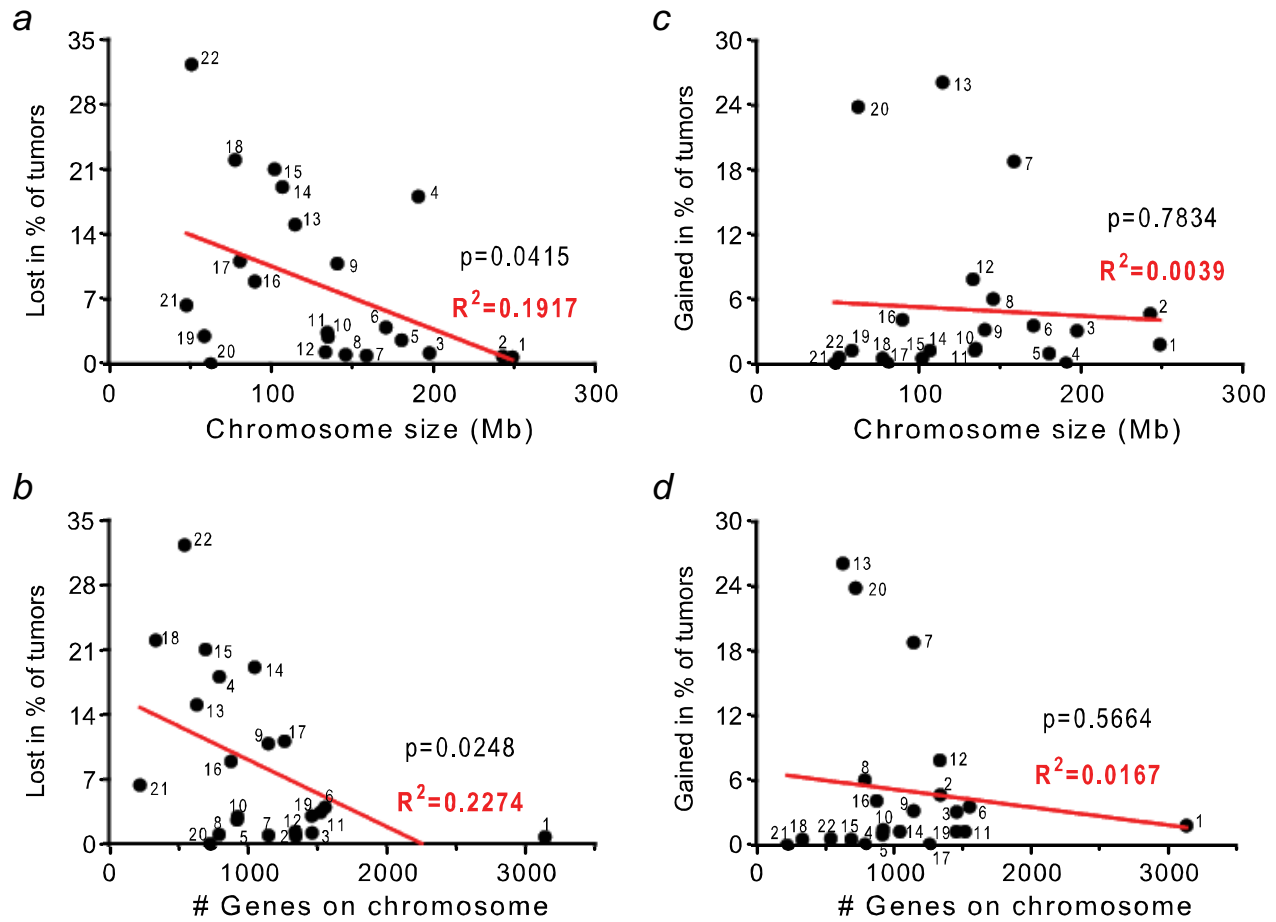

(a) Scatter plot of chromosome size in megabases (Mb) in relationship to the rate at which the chromosome is lost.

(b) Scatter plot as in (a), but for the rate at which each chromosome is gained.

(c) Scatter plot of the number of genes on the chromosome in relationship to the rate at which the chromosome is lost.

(d) Scatter plot as in (c), but for the rate at which each chromosome is gained.

### Supplementary Figure 3

Whole-chromosome aneuploidy state of a tumor correlates with the survival of ovarian serous cystadenocarcinoma patients

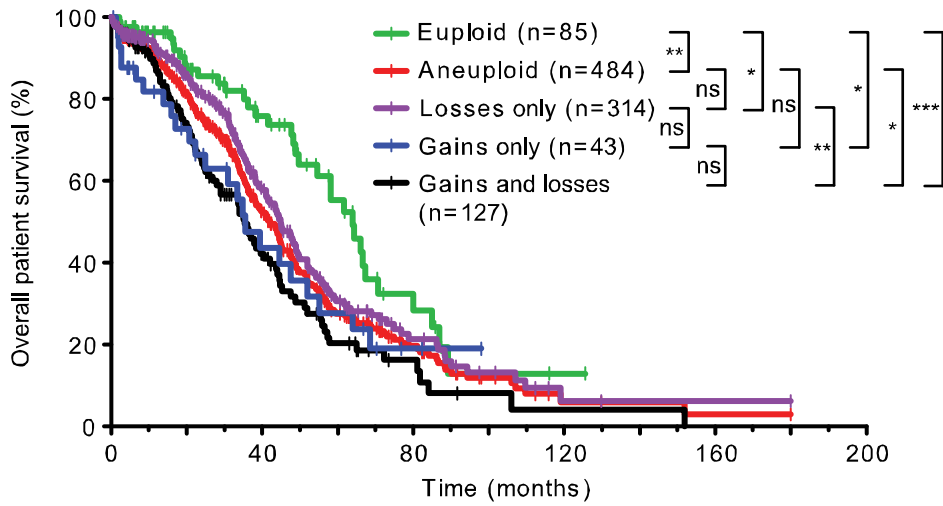

The overall patient survival of subgroups of 569 ovarian serous cystadenocarcinoma patients is plotted. All p values were calculated using the log-rank (Mantel-Cox) test. See also main text. Censored patients are indicated by vertical bars on the curves. The terms “euploid” and “aneuploid” exclusively refer to numerical chromosome abnormalities in this Figure.

**Supplementary Figure 4**

A comparison between early- and late-stage whole-chromosome aneuploidies in human astrocytoma provides insights into tumor evolution.

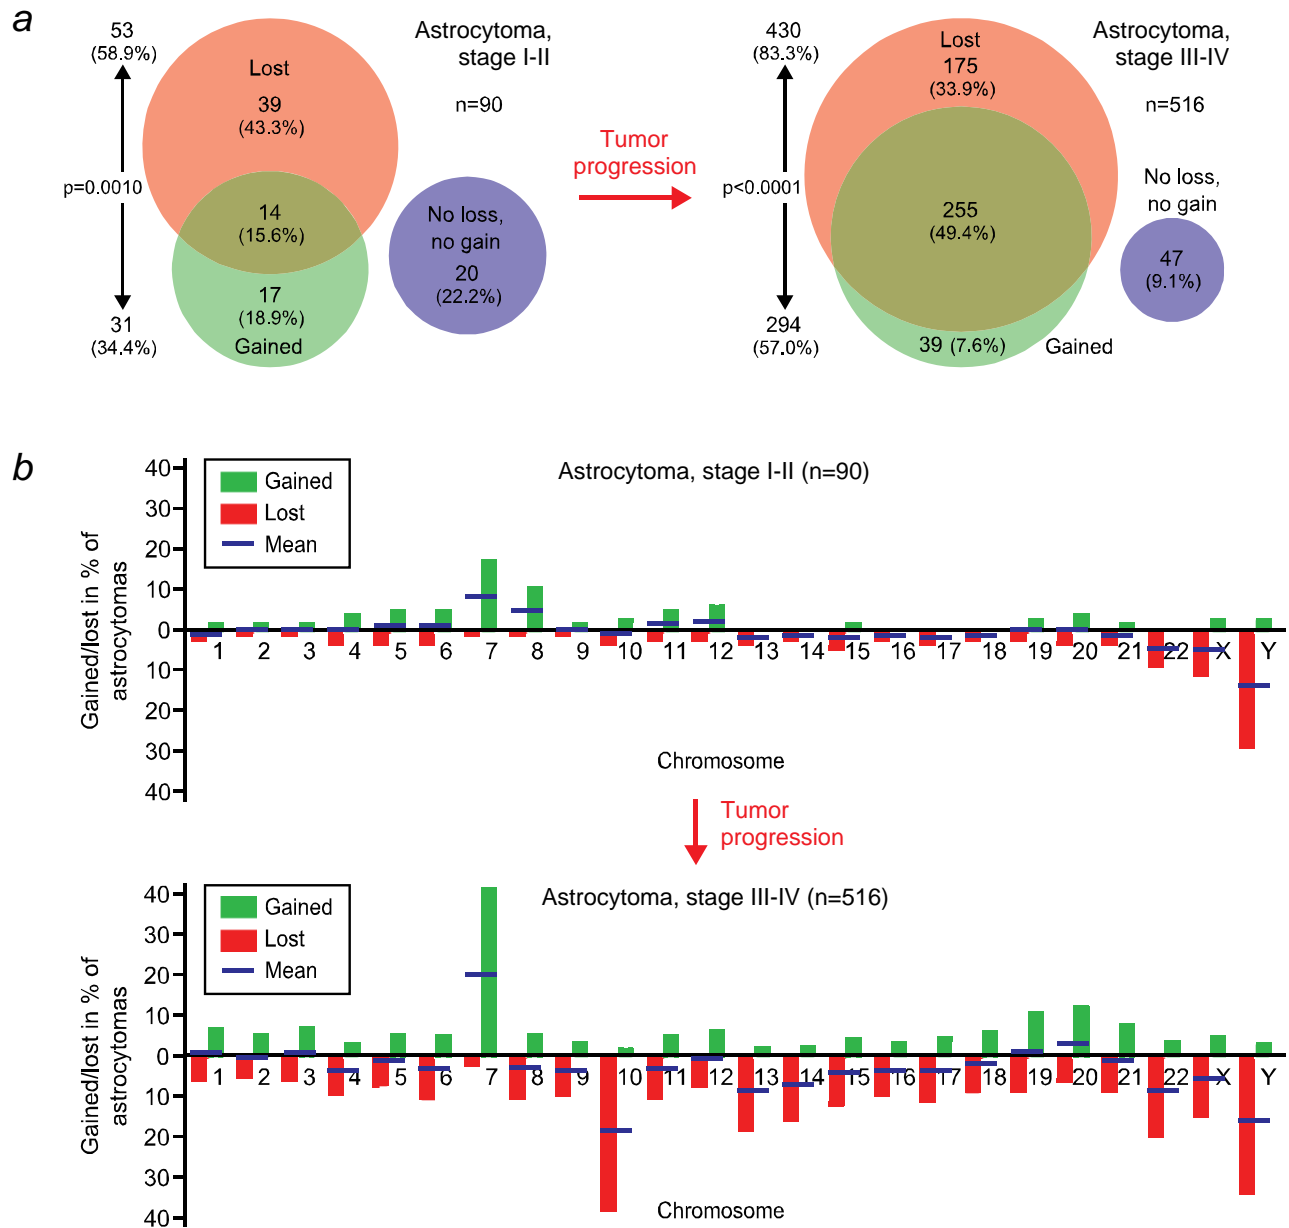

(a) Area-proportional Venn diagrams as in Figure 1a, comparing whole-chromosome gain, loss and aneuploidy rates from early- and late-stage astrocytomas (n=90 and n=516, respectively).

(b) Rates at which early- and late-stage astrocytomas have gained or lost individual whole-chromosomes.
